# Supplementary material for: An Ultra-High-Performance Liquid Chromatography Coupled with Tandem Mass Spectrometry Method with Online Solid-Phase Extraction Sample Preparation for the High-Throughput and Sensitive Determination of Ostarine in Human Urine
Source: MDPI journal article supplement (doi:10.3390/mps7010010), 2024-01-23
Supplement: s1 [file s1]

Article: Supplementary Materials

# An Ultra-High-Performance Liquid Chromatography Coupled with Tandem Mass Spectrometry Method with Online Solid-Phase Extraction Sample Preparation for the High-Throughput and Sensitive Determination of Ostarine in Human Urine

Kristián Slíž<sup>1,2</sup>, Juraj Piešťanský<sup>3</sup> and Peter Mikuš<sup>1,2,\*</sup>

<sup>1</sup> Department of Pharmaceutical Analysis and Nuclear Pharmacy, Faculty of Pharmacy, Comenius University Bratislava, Odbojárov 10, 832 32 Bratislava, Slovakia; kristian.sliz@uniba.sk

<sup>2</sup> Toxicologic and Antidoping Centre, Faculty of Pharmacy, Comenius University Bratislava, Odbojárov 10, 832 32 Bratislava, Slovakia

<sup>3</sup> Department of Galenic Pharmacy, Faculty of Pharmacy, Comenius University Bratislava, Odbojárov 10, 832 32 Bratislava, Slovakia; piestansky@fpharm.uniba.sk

\* Correspondence: mikus@fpharm.uniba.sk; Tel.: +421-2-50-117-243

---

## Contents:

**Table S1.** Comparison of UHPLC-MS/MS methods for the analysis of ostarine in human urine.

**Table S2.** Mass transitions and optimized mass spectrometer parameters applied for mass reaction monitoring (MRM).

**Table S3.** WADA's chromatographic identification criteria: retention time comparison.

**Table S4.** WADA's mass spectrometric identification criteria: relative abundance of two diagnostic ions comparison.

**Figure S1.** Illustrative chromatograms of ten different human urine samples measured at the LOQ level of ostarine demonstrating variability of sample fractions after online-SPE heart-cut, UHPLC analytical separation and MS/MS detection.

**Table S1.** Comparison of UHPLC-MS/MS methods for the analysis of ostarine in human urine.

| Sample preparation            | Column                                      | Detector   | LOD (ng/mL) | Ref.      |
|-------------------------------|---------------------------------------------|------------|-------------|-----------|
| Dilute-and-shoot              | Nucleoshell RP18 Plus (2.0 × 50 mm, 2.7 μm) | Q-Orbitrap | < 0.1       | [16]      |
| SPE                           | Kinetex C18 (2.1 × 100 mm, 1.7 μm)          | Orbitrap   | –           | [17]      |
| Enzym. + SPE                  | Cortecs C18 (2.1 × 100 mm, 2.7 μm)          | QqQ        | 0.005       | [18]      |
| Enzym. + LLE                  | Luna Omega Polar C18 (2.1 × 100 mm, 1.6 μm) | QqQ        | 0.005       | [19]      |
| Enzym. + LLE                  | Nucleodur C18 Pyramid (2.0 × 50 mm, 1.8 μm) | Q-Orbitrap | 0.02        | [20]      |
| Enzym. + LLE                  | Ascentis C18 (2.1 × 150 mm, 2.7 μm)         | QqQ        | 0.1         | [21]      |
| DLLME                         | Kinetex C18 (2.1 × 100 mm, 1.7 μm)          | QqQ        | 0.05        | [22]      |
| Dilute-and-shoot + Online-SPE | Kinetex EVO C18 (2.1 × 100 mm, 2.6 μm)      | QqQ        | 0.0005      | This work |

LOD, limit of detection; Ref., reference; Enzym., enzymatic hydrolysis; SPE, solid-phase extraction; LLE, liquid-liquid extraction; DLLME, dispersive liquid-liquid microextraction; Online-SPE, online solid-phase extraction; Q, quadrupole; QqQ, triple quadrupole.

**Table S2.** Mass transitions and optimized mass spectrometer parameters applied for mass reaction monitoring (MRM).

| Substance     | MRM transition ( <i>m/z</i> ) | Species of the parent ion | Frag (V) | CE (V) |
|---------------|-------------------------------|---------------------------|----------|--------|
| Ostarine      | 390.1 → 120.2 (quantifier)    | [M + H] <sup>+</sup>      | 140      | 36     |
| Ostarine      | 390.1 → 193.2 (qualifier)     | [M + H] <sup>+</sup>      | 140      | 40     |
| Andarine (IS) | 442.1 → 108.1 (quantifier)    | [M + H] <sup>+</sup>      | 140      | 40     |
| Andarine (IS) | 442.1 → 148.1 (qualifier)     | [M + H] <sup>+</sup>      | 140      | 32     |

Frag, fragmentor voltage; CE, collision energy; IS, internal standard.

**Table S3.** WADA's chromatographic identification criteria: retention time comparison.

| No. | Retention time: IS (min) |           |                           | Retention time: ostarine (min) |           |                           |
|-----|--------------------------|-----------|---------------------------|--------------------------------|-----------|---------------------------|
|     | Sample                   | Reference | Max. tolerated diff. ± 1% | Sample                         | Reference | Max. tolerated diff. ± 1% |
| 1   | 18.80                    |           | + 0.1%                    | 18.88                          |           | + 0.1%                    |
| 2   | 18.80                    |           | + 0.1%                    | 18.88                          |           | + 0.1%                    |
| 3   | 18.80                    |           | + 0.1%                    | 18.88                          |           | + 0.1%                    |
| 4   | 18.80                    |           | + 0.1%                    | 18.88                          |           | + 0.1%                    |
| 5   | 18.80                    | 18.78     | + 0.1%                    | 18.88                          | 18.86     | + 0.1%                    |
| 6   | 18.80                    |           | + 0.1%                    | 18.88                          |           | + 0.1%                    |
| 7   | 18.80                    |           | + 0.1%                    | 18.88                          |           | + 0.1%                    |
| 8   | 18.80                    |           | + 0.1%                    | 18.88                          |           | + 0.1%                    |
| 9   | 18.81                    |           | + 0.2%                    | 18.89                          |           | + 0.2%                    |
| 10  | 18.81                    |           | + 0.2%                    | 18.89                          |           | + 0.2%                    |

No, sample number; IS, internal standard; Diff., difference.

**Table S4.** WADA's mass spectrometric identification criteria: relative abundance of two diagnostic ions comparison.

| No. | Diagnostic ion (m/z) | RA (%) |           | Difference (%) | Tolerance window (%)   |
|-----|----------------------|--------|-----------|----------------|------------------------|
|     |                      | Sample | Reference |                |                        |
| 1   | 390.1 → 120.2        | 100    | 100       | - 1.2          | 34.83–52.25<br>(± 20%) |
|     | 390.1 → 193.2        | 43.02  | 43.54     |                |                        |
| 2   | 390.1 → 120.2        | 100    | 100       | - 10.4         |                        |
|     | 390.1 → 193.2        | 39.02  | 43.54     |                |                        |
| 3   | 390.1 → 120.2        | 100    | 100       | - 13.9         |                        |
|     | 390.1 → 193.2        | 37.50  | 43.54     |                |                        |
| 4   | 390.1 → 120.2        | 100    | 100       | - 6.5          |                        |
|     | 390.1 → 193.2        | 40.70  | 43.54     |                |                        |
| 5   | 390.1 → 120.2        | 100    | 100       | - 7.7          |                        |
|     | 390.1 → 193.2        | 41.18  | 43.54     |                |                        |
| 6   | 390.1 → 120.2        | 100    | 100       | - 2.4          |                        |
|     | 390.1 → 193.2        | 42.5   | 43.54     |                |                        |
| 7   | 390.1 → 120.2        | 100    | 100       | + 6.7          |                        |
|     | 390.1 → 193.2        | 46.46  | 43.54     |                |                        |
| 8   | 390.1 → 120.2        | 100    | 100       | + 6.7          |                        |
|     | 390.1 → 193.2        | 46.46  | 43.54     |                |                        |
| 9   | 390.1 → 120.2        | 100    | 100       | - 1.8          |                        |
|     | 390.1 → 193.2        | 42.75  | 43.54     |                |                        |
| 10  | 390.1 → 120.2        | 100    | 100       | - 5.9          |                        |
|     | 390.1 → 193.2        | 40.95  | 43.54     |                |                        |

No, sample number; RA, relative abundance.

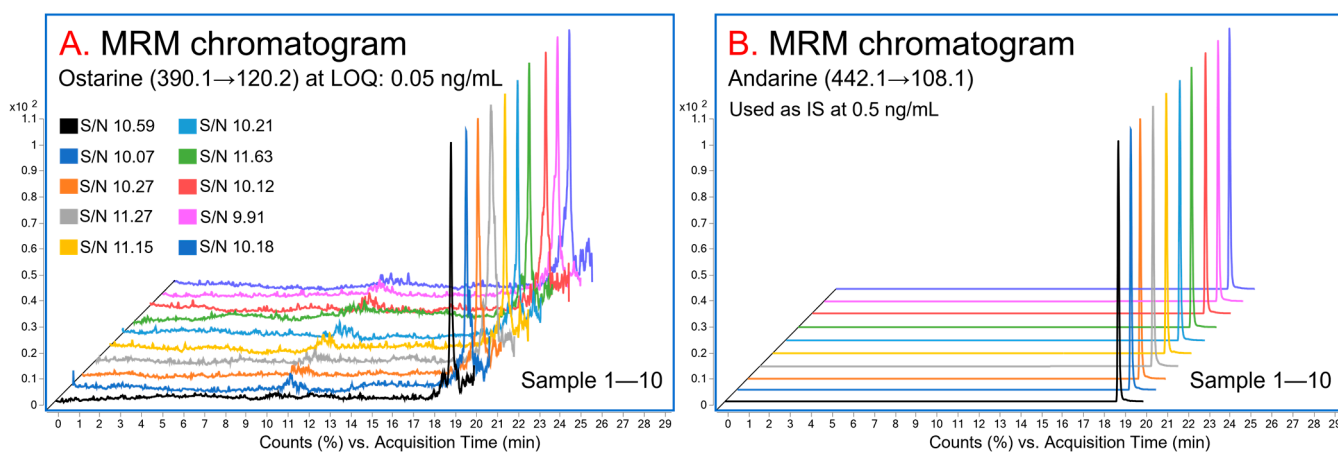**Figure S1.** Illustrative chromatograms of ten different human urine samples measured at the LOQ level of ostarine demonstrating variability of sample fractions after online-SPE heart-cut, UHPLC analytical separation and MS/MS detection.
